# Supplementary material for: NH2-PEG-AuNR-Based Surface-Enhanced Raman Spectroscopy for Rapid Detection of AFB1: Dark Tea Safety Assessment
Source: Research Square preprint supplement (doi:10.21203/rs.3.rs-7144899/v1), 2025-07-29
Supplement: Supplementary file 1 [file e989c94e91eb5cf0ca3e1208.docx]

**Table S1.** Application of SERS technology based on gold nanocomposites for the detection of AFB1 in foodstuffs.

| SERS substrate | Food matrix | Preprocessing | Recognition mode | Quantitative range | Limit of detection | Reference |
| --- | --- | --- | --- | --- | --- | --- |
| Fe3O4@AuNFs-cDNA&Au-4MBA@Ag NSs-Apt | Peanut oil | ★★ | Aptamer binding | 10-4~102 ng/ mL | 4×10-4  ng/ mL | (He, Sun, Pu, & Huang, 2020) |
| NH2-DNA1-CS-Fe3O4&SH-DNA2-ADANR | Peanut oil | ★ | Aptamer binding | 10-2~102 ng/ mL | 3.6×10-3 ng/ mL | (Chen, Yang, Yang, Li, Guo, & Rahma, 2018) |
| DSNS-AuNPs | Wheat, maize, rice | ★★★ | Immune reconstitution | 0.2~5.0  μg /kg | 6.1×10-2 μg /kg | (Li, et al., 2018) |
| Au@AgNPs-Melamine | tea-seed oil | ★ | Hydrogen bonding between AFB1 and melamine | 10-4 ~10-7 mol/L | 10-8  mol/L | (Chen, Chen, Zhang, Zhang, Yu, Song, et al., 2022) |
| NH2-Rh-Au@Ag CSNPs | barley | ★★ | Aptamer binding | 0.1~5.0 ng/mL | 0.03  ng/mL | (Jiao, Ahmad, Zhu, Hassan, Wang, Rong, et al., 2021) |
| AuNP dimers-MXenes assemblies | Peanuts | ★★★ | Aptamer binding | 10-3~102 ng/mL | 6×10-4  ng/ mL | (Wu, Sun, Pu, Wei, & Lin, 2022) |
| NH2-PEG-AuNRs | Pu-erh tea infusion | ★ | Hydrogen bonding between AFB1 and aminated polyethylene glycols | 10-1 ~ 10-9 ng/mL | 10-9  ng/mL | This stady |

**Note:** Complexity of the treatment of the sample and the binding of the sample to the substrate "★": simple pre-treatment step; "★★": complex pre-treatment step; "★★★": very complex pre-treatment step.
